# Supplementary material
Source: PubMed Central journal article supplement (PMC9827370)
Supplement: 00196-2022.SUPPLEMENT_S1.pdf [file 00196-2022.SUPPLEMENT_S1.pdf]

## Appendix A: list of publications reviewed to inform the situation regarding the use of LUS in COVID-19 in different regions/countries

Taking into account that a deep analysis regarding use of LUS in the management of COVID-19 in different countries and regions was not available at the time of preparation of this manuscript, it was considered that extrapolation of data from a review of the studies published on this topic could be a suitable pragmatic approach for inferring on the use of LUS in different regions and countries. However, a limitation of this approach is that the number of published papers may not necessarily reflect the actual routine clinical practice in the use of LUS within that country/region.

Searches were performed using PubMed and Google Scholar databases using the key words “COVID-19”, “lung ultrasound” and “imaging”. Only English-language articles were included in this review. Review papers were not included, since these don’t use primary data, but case series and case reports were incorporated. Each publication was examined noting the field, the objectives, and the country where the study was performed.

A total of 200 publications from May 2020 to November 2021 met the criteria for the literature review (*see table below*). It can be noted that 65% of all the reported data came from Europe and more than 60% of all the papers reviewed were published by five countries: Italy, China, USA, Spain, and UK (including national and multinational studies).

Keeping in mind that more exhaustive searches in other languages and including non-traditional large databases would be needed to improve data collection of trends in use of LUS in low- and middle-income countries (LMICs), this literature review indicates a paucity of data on the use of LUS for COVID-19 management in LMICs.

| First author | Title                                                                                                                                                  | Journal                 | Country      | Clinical application                          |
|--------------|--------------------------------------------------------------------------------------------------------------------------------------------------------|-------------------------|--------------|-----------------------------------------------|
| Abrams ER    | Point-of-Care Ultrasound in the Evaluation of COVID-19. doi: 10.1016/j.jemermed.2020.06.032                                                            | J Emerg Med             | USA          | General application                           |
| Agricola E   | Heart and Lung Multimodality Imaging in COVID-19. doi: 10.1016/j.jcmg.2020.05.017                                                                      | JACC Cardiovasc Imaging | Italy        | Heart and lung ultrasound                     |
| Alharthy A   | Prospective Longitudinal Evaluation of Point-of-Care Lung Ultrasound in Critically Ill Patients with Severe COVID-19 Pneumonia. doi: 10.1002/jum.15417 | J Ultrasound Med        | Saudi Arabia | Follow up in critically ill COVID-19 patients |

|                   |                                                                                                                                                                                                                |                                 |                        |                                                         |
|-------------------|----------------------------------------------------------------------------------------------------------------------------------------------------------------------------------------------------------------|---------------------------------|------------------------|---------------------------------------------------------|
| Allinovi M        | Lung Ultrasound May Support Diagnosis and Monitoring of COVID-19 Pneumonia. doi: 10.1016/j.ultrasmedbio.2020.07.018                                                                                            | Ultrasound Med Biol             | Italy                  | LUS for diagnosis and monitoring of COVID pneumonia     |
| Antúñez-Montes OY | Feasibility of Lung Point-of-Care Ultrasound for Patients with COVID-19 in Air Medical Transport: Triage of 2 Initially Suspected Cases on Mexico's Front Line. DOI:10.1002/jum.15414                          | J Ultrasound Med                | Mexico                 | Triage                                                  |
| Antúñez-Montes OY | Proposal to Unify the Colorimetric Triage System with the Standardized Lung Ultrasound Score for COVID-19. doi: 10.1002/jum.15446                                                                              | J Ultrasound Med                | Mexico                 | Triage                                                  |
| Antúñez-Montes OY | Routine use of Point-of-Care lung ultrasound during the COVID-19 pandemic. doi: 10.1016/j.medin.2020.04.010                                                                                                    | Med Intensiva                   | Italy                  | General application                                     |
| Matthies AK       | Diagnostic accuracy of point-of-care lung ultrasound for COVID-19: A systematic review and meta-analysis <a href="https://doi.org/10.1101/2021.10.09.21264799">https://doi.org/10.1101/2021.10.09.21264799</a> | medRxiv                         | UK                     | Diagnostic accuracy                                     |
| Aziz R            | Essential notes: The use of Lung Ultrasound for COVID-19 in the intensive care unit doi: 10.1016/j.bjae.2020.09.001                                                                                            | BJA Educ                        | UK, USA                | LUS in ICU                                              |
| Baig MA           | The Rapid COVID Screening (RCS) Tool. doi: 10.29271/jcpsp.2020.Supp1.S56                                                                                                                                       | J Coll Physicians Surg Pak      | Pakistan               | LUS for screening COVID patients                        |
| Baker K           | Lung Ultrasound in a COVID Pandemic - Choosing wisely. <a href="https://doi.org/10.1002/ajum.12213">https://doi.org/10.1002/ajum.12213</a>                                                                     | Australas J Ultrasound Med.     | Australia              | General application                                     |
| Bar S             | The association of lung ultrasound images with COVID-19 infection in an emergency room cohort. doi: 10.1111/anae.15175                                                                                         | Anaesthesia                     | France                 | LUS in emergency room                                   |
| Boccatonda A      | Can Lung Ultrasound be Used to Screen for Pulmonary Embolism in Patients with SARS-CoV-2 Pneumonia? doi: 10.12890/2020_001748                                                                                  | Eur J Case Rep Intern Med       | Italy                  | General application                                     |
| Boero E           | The role of lung ultrasonography in COVID-19 disease management. <a href="https://doi.org/10.1002/emp2.12194">https://doi.org/10.1002/emp2.12194</a>                                                           | J Am Coll Emerg Physicians Open | Italy, UK, Canada, USA | General application                                     |
| Bonadia N         | Lung Ultrasound Findings Are Associated with Mortality and Need for Intensive Care Admission in COVID-19 Patients Evaluated in the Emergency Department. doi: 10.1016/j.ultrasmedbio.2020.07.005               | Ultrasound Med Biol             | Italy                  | LUS findings associated with mortality and need for ICU |

|                  |                                                                                                                                                                                                                    |                                              |                |                                          |
|------------------|--------------------------------------------------------------------------------------------------------------------------------------------------------------------------------------------------------------------|----------------------------------------------|----------------|------------------------------------------|
| Bosso G          | Lung ultrasound as diagnostic tool for SARS-CoV-2 infection<br><a href="https://doi.org/10.1007/s11739-020-02512-y">https://doi.org/10.1007/s11739-020-02512-y</a>                                                 | Intern Emerg Med                             | Italy          | General application                      |
| Brahier T        | Lung ultrasonography for risk stratification in patients with COVID-19: a prospective observational cohort study<br><a href="https://doi.org/10.1093/cid/ciaa1408">https://doi.org/10.1093/cid/ciaa1408</a>        | Clin Infect Dis                              | Switzerland    | Risk assessment                          |
| Buda N           | Consensus of the Study Group for Point-of-Care Lung Ultrasound in the intensive care management of COVID-19 patients. doi: 10.5114/ait.2020.96560                                                                  | Anaesthesiol Intensive Ther                  | Poland         | General application                      |
| Buda N           | Lung ultrasound in the diagnosis of COVID-19 infection - A case series and review of the literature. doi: 10.1016/j.advms.2020.06.005.                                                                             | Adv Med Sci                                  | Poland         | General Application                      |
| Buonsenso D      | Clinical role of lung ultrasound for diagnosis and monitoring of COVID-19 pneumonia in pregnant women. doi: 10.1002/uog.22055                                                                                      | Ultrasound Obstet Gynecol                    | Italy          | LUS in pregnancy                         |
| Buonsenso D      | Effectiveness of rapid lung ultrasound training program for gynecologists and obstetricians managing pregnant women with suspected COVID-19. doi: 10.1002/uog.22066                                                | Ultrasound Obstet Gynecol.                   | Italy          | LUS in pregnancy                         |
| Buonsenso D      | Point-of-Care Lung Ultrasound findings in novel coronavirus disease-19 pneumoniae: a case report and potential applications during COVID-19 outbreak. 2020 Mar;24(5):2776-2780. doi: 10.26355/eurrev_202003_20549  | Eur Rev Med Pharmacol Sci.                   | Italy          | General application                      |
| Calvo-Cebrián A  | Usefulness of Lung Ultrasound Examinations Performed by Primary Care Physicians in Patients with Suspected COVID-19. doi: 10.1002/jum.15444                                                                        | J Ultrasound Med                             | Spain          | LUS used by primary healthcare physician |
| Caro-Dominguez P | Collaborators of the European Society of Paediatric Radiology Cardiothoracic Task Force. Thoracic imaging of coronavirus disease 2019 (COVID-19) in children: a series of 91 cases doi: 10.1007/s00247-020-04747-5 | Pediatr Radiol                               | Spain, USA, UK | LUS in paediatrics                       |
| Carrer L         | Automatic Pleural Line Extraction and COVID-19 Scoring from Lung Ultrasound Data. doi: 10.1109/TUFFC.2020.3005512                                                                                                  | IEEE Trans Ultrason Ferroelectr Freq Control | Italy          | LUS and Artificial Intelligence          |
| Casper Falster   | Lung ultrasound may be a valuable aid in decision making for                                                                                                                                                       | European Clinical                            | Denmark        | General                                  |

|                |                                                                                                                                                                                         |                                        |             |                                         |
|----------------|-----------------------------------------------------------------------------------------------------------------------------------------------------------------------------------------|----------------------------------------|-------------|-----------------------------------------|
|                | patients admitted with COVID-19 disease<br><a href="https://doi.org/10.1080/20018525.2021.1909521">https://doi.org/10.1080/20018525.2021.1909521</a>                                    | Respiratory Journal                    |             | application                             |
| Castelao J     | Findings and Prognostic Value of Lung Ultrasound in COVID-19 Pneumonia. <a href="https://doi.org/10.1002/jum.15508">https://doi.org/10.1002/jum.15508</a>                               | J Ultrasound Med                       | Spain       | LUS in prognosticating COVID patients   |
| Cho YJ         | Lung ultrasound for early diagnosis and severity assessment of pneumonia in patients with coronavirus disease 2019. doi: 10.3904/kjim.2020.180                                          | Korean J Intern Med                    | South Korea | Early diagnosis and severity assessment |
| Cocconcelli E  | Clinical Features and Chest Imaging as Predictors of Intensity of Care in Patients with COVID-19 doi: 10.3390/jcm9092990.                                                               | J Clin Med                             | Italy       | LUS for risk stratification             |
| McDermott C    | Sonographic Diagnosis of COVID-19: A Review of Image Processing for Lung Ultrasound doi: 10.3389/fdata.2021.612561                                                                      | Frontiers in Big Data journal          | Canada      | General application                     |
| Consoli L      | 2019 novel coronavirus (COVID-19) pneumonia complications: the importance of lung ultrasound. doi: 10.1007/s40477-020-00494-3                                                           | J Ultrasound                           | Italy       | General application                     |
| Conway H       | Personalizing Invasive Mechanical Ventilation Strategies in Coronavirus Disease 2019 (COVID-19)-Associated Lung Injury: The Utility of Lung Ultrasound. doi: 10.1053/j.jvca.2020.04.062 | J Cardiothorac Vasc Anesth             | UK          | LUS in ICU                              |
| Dargent A      | COVID-LUS study group. Lung ultrasound score to monitor COVID-19 pneumonia progression in patients with ARDS. doi: 10.1371/journal.pone.0236312                                         | PLoS One                               | France      | LUS scoring application                 |
| Davidovna KZ   | A single-center comparative study of lung ultrasound versus CT during the COVID-19 era doi: 10.4081/mrm.2021.766                                                                        | Multidisciplinary Respiratory Medicine | Russia      | Comparison LUS and CT                   |
| de Oliveira RR | Lung ultrasound: an additional tool in COVID-19. doi: 10.1590/0100-3984.2020.0051                                                                                                       | Radiol Bras                            | Brazil      | General application                     |
| De Rose C      | How to Perform Pediatric Lung Ultrasound Examinations in the Time of COVID-19. doi: 10.1002/jum.15306                                                                                   | J Ultrasound Med.                      | Italy       | LUS in paediatrics                      |
| Delrio S       | Lung ultrasound signs and cytokine profile in Covid-19 patients: a case series DOI: 10.26355/eurrev_202009_22799                                                                        | Eur Rev Med Pharmacol Sci              | Italy       | General application                     |
| Denault AY     | A proposed lung ultrasound and phenotypic algorithm for the care of COVID-19 patients with acute respiratory failure. doi: 10.1007/s12630-020-01704-6                                   | Can J Anaesth                          | Canada      | General application                     |

|               |                                                                                                                                                                                       |                            |         |                                                     |
|---------------|---------------------------------------------------------------------------------------------------------------------------------------------------------------------------------------|----------------------------|---------|-----------------------------------------------------|
| Deng Q        | Semiquantitative lung ultrasound scores in the evaluation and follow-up of critically ill patients with COVID-19: a single-center study. doi: 10.1016/j.acra.2020.07.002              | Acad Radiol                | China   | LUS for score in evaluating critically ill patients |
| Denina M      | Lung Ultrasound in Children With COVID-19.. doi: 10.1542/peds                                                                                                                         | Pediatrics                 | Italy   | LUS in paediatrics                                  |
| Di Serafino M | The lung ultrasound: facts or artifacts? In the era of COVID-19 outbreak. doi: 10.1007/s11547-020-01236-5                                                                             | Radiol Med                 | Italy   | Comparison LUS and CT                               |
| Dini FL       | Bedside wireless lung ultrasound for the evaluation of COVID-19 lung injury in senior nursing home residents. doi: 10.4081/monaldi.2020.1446.                                         | Monaldi Arch Chest Dis     | Italy   | Bedside wireless LUS in nursing homes               |
| Duclos G      | "No dose" lung ultrasound correlation with "low dose" CT scan for early diagnosis of SARS-CoV-2 pneumonia. doi: 10.1007/s00134-020-06058-7                                            | Intensive Care Med         | France  | Comparison LUS and CT                               |
| Duggan NM     | Using Lung Point-of-care Ultrasound in Suspected COVID-19: Case Series and Proposed Triage Algorithm. doi: 10.5811/cpcem.2020.7.47912                                                 | Clin Pract Cases Emerg Med | USA     | LUS application at POC                              |
| Duggan NM     | Best Practice Recommendations for Point-of-Care Lung Ultrasound in Patients with Suspected COVID-19. doi: 10.1016/j.jemermed.2020.06.033                                              | J Emerg Med                | USA     | Proposed LUS protocol                               |
| Espersen C    | Lung Ultrasound Findings Associated With COVID-19 ARDS, ICU Admission, and All-Cause Mortality. doi: 10.4187/respcare.09108                                                           | Respir Care                | Denmark | Risk assessment                                     |
| Farrow R      | Early Multi-organ Point-of-Care Ultrasound Evaluation of Respiratory Distress During SARS-CoV-2 Outbreak: Case Report. doi: 10.5811/cpcem.2020.4.47524                                | Clin Pract Cases Emerg Med | USA     | General application                                 |
| Favot M       | Point-of-Care Lung Ultrasound for Detecting Severe Presentations of Coronavirus Disease 2019 in the Emergency Department: A Retrospective Analysis. doi: 10.1097/CCE.0000000000000176 | Crit Care Explor           | USA     | LUS in detecting severe cases                       |
| Feng XY       | Application of pulmonary ultrasound in the diagnosis of COVID-19 pneumonia in neonates. doi: 10.3760/cma.j.cn112140-20200228-00154                                                    | Zhonghua Er Ke Za Zhi      | China   | General application                                 |
| Flower L      | The Use of Point-of-Care Lung Ultrasound and                                                                                                                                          | J Cardiothorac             | UK      | General                                             |

|                      |                                                                                                                                                                                                              |                                   |        |                                                              |
|----------------------|--------------------------------------------------------------------------------------------------------------------------------------------------------------------------------------------------------------|-----------------------------------|--------|--------------------------------------------------------------|
|                      | Echocardiography in the Management of Coronavirus Disease 2019 (COVID-19).doi: 10.1053/j.jvca.2020.05.009                                                                                                    | Vasc Anesth                       |        | application (LUS and heart US)                               |
| Fonsi GB             | Is Lung Ultrasound Imaging a Worthwhile Procedure for Severe Acute Respiratory Syndrome Coronavirus 2 Pneumonia Detection? <a href="https://doi.org/10.1002/jum.15487">https://doi.org/10.1002/jum.15487</a> | J Ultrasound Med                  | Italy  | Self-performed LUS                                           |
| Fox S                | Point-of-care ultrasound and COVID-19. 2020 May 14. doi: 10.3949/ccjm.87a.ccc019                                                                                                                             | Cleve Clin J Med                  | USA    | General application                                          |
| Fraille Gutiérrez V  | Ultrasound in the management of the critically ill patient with SARS-CoV-2 infection (COVID-19): narrative review doi: 10.1016/j.medin.2020.04.016                                                           | Med Intensiva                     | Spain  | LUS in ICU                                                   |
| García-Cruz E        | Critical care ultrasonography during COVID-19 pandemic: The ORACLE protocol. doi: 10.1111/echo.14837.                                                                                                        | Echocardiography                  | Mexico | General application (LUS and heart US)                       |
| Garcia de Alencar JC | Lung ultrasound score predicts outcomes in COVID-19 patients admitted to the emergency department <a href="https://doi.org/10.1186/s13613-020-00799-w">https://doi.org/10.1186/s13613-020-00799-w</a>        | Annals of Intensive Care          | Brazil | LUS in emergency room                                        |
| Gaspardone C         | Lung Ultrasound in COVID-19 A Role Beyond the Acute Phase? doi: 10.1002/jum.15425.                                                                                                                           | J Ultrasound Med                  | Italy  | General application                                          |
| Gil-Rodrigo A        | Diagnostic yield of point-of-care ultrasound imaging of the lung in patients with COVID-19 <a href="https://europepmc.org/article/med/33006834">https://europepmc.org/article/med/33006834</a>               | Emergencias                       | Spain  | General application                                          |
| Gino Soldati, MD,    | LUS for COVID-19 Pneumonia: Flexible or Reproducible Approach? <a href="https://doi.org/10.1371/journal.pone.0256359">https://doi.org/10.1371/journal.pone.0256359</a>                                       | Journal of ultrasound in medicine | Italy  | General application                                          |
| Giugno V             | Lung Ultrasound (LUS) in COVID-19 Pneumonia: Usefulness in Two Atypical Cases. DOI: 10.12890/2020_001800                                                                                                     | Eur J Case Rep Intern Med         | Italy  | General application                                          |
| Gopar-Nieto R        | Lung ultrasound for the identification of COVID-19 pneumonia. doi: 10.24875/ACM.M20000071                                                                                                                    | Arch Cardiol Mex                  | Spain  | General application                                          |
| Gregorio-Hernández R | Point-of-care lung ultrasound in three neonates with COVID-19. doi: 10.1007/s00431-020-03706-4                                                                                                               | Eur J Pediatr                     | Spain  | LUS in neonates                                              |
| Guarracino F         | Lung, Heart, Vascular, and Diaphragm Ultrasound Examination of COVID-19 Patients: A Comprehensive Approach. doi: 10.1053/j.jvca.2020.06.013                                                                  | J Cardiothorac Vasc Anesth        | Italy  | Comprehensive approach (lung, heart, vascular and diaphragm) |

|              |                                                                                                                                                                                                                                                       |                           |            |                                    |
|--------------|-------------------------------------------------------------------------------------------------------------------------------------------------------------------------------------------------------------------------------------------------------|---------------------------|------------|------------------------------------|
|              |                                                                                                                                                                                                                                                       |                           |            | US)                                |
| Hoffmann T   | Can follow up lung ultrasound in Coronavirus Disease-19 patients indicate clinical outcome?<br><a href="https://doi.org/10.1371/journal.pone.0256359">https://doi.org/10.1371/journal.pone.0256359</a>                                                | Plos one                  | Germany    | General application                |
| Hsiao YH     | Using lung ultrasound changes to evaluate the response of recruitment maneuver in a patient recovering from coronavirus disease 2019 with acute respiratory distress syndrome. doi: 10.1097/JCMA.0000000000000418.                                    | J Chin Med Assoc          | China      | LUS compared to CXR                |
| Inchingolo R | The diagnosis of pneumonia in a pregnant woman with coronavirus disease 2019 using maternal lung ultrasound. doi: 10.1016/j.ajog.2020.04.020                                                                                                          | Am J Obstet Gynecol       | Italy      | LUS in pregnancy                   |
| Iodice V     | Use of lung ultrasound in COVID-19: comparison with ultra-high-resolution computed tomography among 29 patients at "D. Cotugno" hospital, Naples<br><a href="https://pubmed.ncbi.nlm.nih.gov/32920569/">https://pubmed.ncbi.nlm.nih.gov/32920569/</a> | Infez Med                 | Italy      | Comparison LUS and CT              |
| Jackson K    | Lung ultrasound in the COVID-19 pandemic<br>DOI: 10.1136/postgradmedj-2020-138137                                                                                                                                                                     | Postgrad Med J            | UK         | General application                |
| Ji L         | Response to: Lung ultrasound early detection and monitoring in COVID-19 pneumonia: fact and fiction. doi: 10.1093/qjmed/hcaa166                                                                                                                       | QJM                       | China      | General application and monitoring |
| Johri AM     | ASE Statement on Point-of-Care Ultrasound during the 2019 Novel Coronavirus Pandemic. doi: 10.1016/j.echo.2020.04.017                                                                                                                                 | J Am Soc Echocardiogr.    | USA        | LUS at PoC                         |
| Jung EM      | Contrast enhanced ultrasound (CEUS) to assess pleural pulmonary changes in severe COVID-19 infection: First results. doi: 10.3233/CH-209005                                                                                                           | Clin Hemorheol Microcirc  | Germany    | Contrast-enhanced LUS              |
| Kalafat E    | Lung ultrasound and computed tomographic findings in pregnant woman with COVID-19. doi: 10.1002/uog.22034                                                                                                                                             | Ultrasound Obstet Gynecol | Turkey     | LUS and CT in pregnancy            |
| Kalafat E    | Utility of lung ultrasound assessment for probable SARS-CoV-2 infection during pregnancy and universal screening of asymptomatic individuals doi: 10.1002/uog.23099                                                                                   | Ultrasound Obstet Gynecol | Turkey     | LUS in pregnancy                   |
| Karagöz A    | Accuracy of Bedside Lung Ultrasound as a Rapid Triage Tool for Suspected Covid-19 Cases doi: 10.1097/RUQ.0000000000000530.                                                                                                                            | Ultrasound quarterly      | Turkey     | Triage                             |
| Karakus O    | Detection of Line Artefacts in Lung Ultrasound Images of                                                                                                                                                                                              | IEEE Trans                | UK, France | Physics of LUS                     |

|                |                                                                                                                                                                                                                                    |                                         |           |                                             |
|----------------|------------------------------------------------------------------------------------------------------------------------------------------------------------------------------------------------------------------------------------|-----------------------------------------|-----------|---------------------------------------------|
|                | COVID-19 Patients via Non-Convex Regularization. doi: 10.1109/TUFFC.2020.3016092.                                                                                                                                                  | Ultrason<br>Ferroelectr Freq<br>Control |           |                                             |
| Karl Jackson   | Lung ultrasound in the COVID-19 pandemic<br><a href="http://dx.doi.org/10.1136/postgradmedj-2020-138137">http://dx.doi.org/10.1136/postgradmedj-2020-138137</a>                                                                    | Postgrad Med J                          | UK        | General<br>application                      |
| Kennedy TM     | Lung Point-of-Care Ultrasound in Pediatric COVID-19: A Case Series doi: 10.1097/PEC.0000000000002254                                                                                                                               | Pediatr Emerg<br>Care                   | USA       | General<br>application                      |
| Khalili N      | Lung Ultrasound in COVID-19 Pneumonia: Prospects and Limitations. doi: 10.1016/j.acra.2020.04.032                                                                                                                                  | Acad Radiol.                            | Iran      | General<br>application                      |
| Kiamanesh O    | Lung Ultrasound for Cardiologists in the Time of COVID-19. doi: 10.1016/j.cjca.2020.05.008                                                                                                                                         | Can J Cardiol                           | Canada    | General<br>application                      |
| Kiefl D        | German recommendations on lung and thoracic ultrasonography in patients with COVID-19<br>DOI: 10.1007/s00063-020-00740-w                                                                                                           | PMID                                    | Germany   | Recommendations<br>on LUS<br>applications   |
| Kirkpatrick AW | Lung ultrasonography in a woman with COVID-19: This examination could be remote. doi: 10.1503/cmaj.75302                                                                                                                           | CMAJ                                    | Canada    | General<br>application                      |
| Kulkarni S     | Point-of-care lung ultrasound in intensive care during the COVID-19 pandemic. doi: 10.1016/j.crad.2020.05.001                                                                                                                      | Clin Radiol                             | UK        | LUS in ICU                                  |
| Kunze G        | Lungenultraschall bei Patienten mit SARS-CoV-2-Infektion [Lung ultrasound in patients with SARS-CoV-2 infection]. doi: 10.1007/s10049-020-00767-8                                                                                  | Notf Rett Med                           | Germany   | General<br>application                      |
| Lerchbaumer MH | Point-of-care lung ultrasound in COVID-19 patients: inter and intra-observer agreement in a prospective observational study<br><a href="https://doi.org/10.1038/s41598-021-90153-2">https://doi.org/10.1038/s41598-021-90153-2</a> | Scientific reports                      | Germany   | Diagnostic<br>accuracy                      |
| Lichter Y      | Lung ultrasound predicts clinical course and outcomes in COVID-19 patients doi: 10.1007/s00134-020-06212-1                                                                                                                         | Intensive Care<br>Med                   | Israel    | LUS in<br>prognosticating<br>COVID patients |
| Liu RB         | Ultrasound on the Frontlines of COVID-19: Report From an International Webinar. doi: 10.1111/acem.14004                                                                                                                            | Acad Emerg Med.                         | USA       | General<br>application                      |
| Lokuge A       | Lung ultrasound in a respiratory pandemic. doi: 10.1111/1742-6723.13575                                                                                                                                                            | Emerg Med<br>Australas                  | Australia | General<br>application                      |
| Lomoro P       | COVID-19 pneumonia manifestations at the admission on chest ultrasound, radiographs, and CT: single-center study and comprehensive radiologic literature review. doi:                                                              | Eur J Radiol Open                       | Italy     | Comparison LUS,<br>CT and CXR               |



|                |                                                                                                                                                                                                                                                                                       |                            |               |                                               |
|----------------|---------------------------------------------------------------------------------------------------------------------------------------------------------------------------------------------------------------------------------------------------------------------------------------|----------------------------|---------------|-----------------------------------------------|
|                | 10.1016/j.ejro.2020.100231.                                                                                                                                                                                                                                                           |                            |               |                                               |
| Lopes AJ       | Comparison Between Lung Ultrasound and Computed Tomographic Findings in Patients With COVID-19 Pneumonia <a href="https://doi.org/10.1002/jum.15521">https://doi.org/10.1002/jum.15521</a>                                                                                            | J Ultrasound Med           | Brazil        | Comparison LUS and CT                         |
| Louise Hansell | Lung ultrasound has greater accuracy than conventional respiratory assessment tools for the diagnosis of pleural effusion, lung consolidation and collapse: a systematic review <a href="https://doi.org/10.1016/j.jphys.2020.12.002">https://doi.org/10.1016/j.jphys.2020.12.002</a> | Journal of Physiotherapy   | Australia     | Comparison LUS and CXR                        |
| Lu W           | A Clinical Study of Noninvasive Assessment of Lung Lesions in Patients with Coronavirus Disease-19 (COVID-19) by Bedside Ultrasound. doi: 10.1055/a-1154-8795                                                                                                                         | Ultraschall Med            | China         | General application                           |
| Lu X           | Lung ultrasound score in establishing the timing of intubation in COVID-19 interstitial pneumonia: A preliminary retrospective observational study. <a href="https://doi.org/10.1371/journal.pone.0238679">https://doi.org/10.1371/journal.pone.0238679</a>                           | PLoS One                   | China         | LUS in deciding on intubation                 |
| Lugnan C       | Lung ultrasonography in COVID-19: a game changer in the stroke unit? doi: 10.1111/ene.14352                                                                                                                                                                                           | Eur J Neurol.              | Mexico, Italy | General application                           |
| Luna Gargani   | Why, when, and how to use lung ultrasound during the COVID-19 pandemic: enthusiasm and caution. <a href="https://doi.org/10.1093/ehjci/jeaa163">https://doi.org/10.1093/ehjci/jeaa163</a>                                                                                             | European Heart Journal     | UK            | General application                           |
| Maadarani O    | Point-of-Care Ultrasound Can Suggest COVID-19. DOI: 10.12890/2020_001915                                                                                                                                                                                                              | Eur J Case Rep Intern Med. | Kuwait        | General application                           |
| Mafort TT      | Changes in lung ultrasound of symptomatic healthcare professionals with COVID-19 pneumonia and their association with clinical findings. <a href="https://doi.org/10.1002/jcu.22905">https://doi.org/10.1002/jcu.22905</a>                                                            | J Clin Ultrasound.         | Brazil        | LUS application in symptomatic health workers |
| Manivel V      | CLUE: COVID-19 lung ultrasound in emergency department. doi: 10.1111/1742-6723.13546                                                                                                                                                                                                  | Emerg Med Australas        | Australia     | LUS in emergency room                         |
| Marggrander DT | Lung Ultrasound Findings in Patients with COVID-19. doi: 10.1016/j.ajem.2020.08.080                                                                                                                                                                                                   | PMID                       | Germany       | General application                           |
| McDermott C    | Combatting COVID-19: is ultrasound an important piece in the diagnostic puzzle? <a href="http://dx.doi.org/10.1136/emermed-2020-209721">http://dx.doi.org/10.1136/emermed-2020-209721</a>                                                                                             | Emerg Med J.               | Ireland, UK   | General application                           |
| McElyea C      | Lung ultrasound artifacts in COVID-19 patients. doi: 10.1007/s40477-020-00526-y                                                                                                                                                                                                       | J Ultrasound               | USA           | General application                           |

|                   |                                                                                                                                                                                                                                                                                                                                        |                                                |                    |                                   |
|-------------------|----------------------------------------------------------------------------------------------------------------------------------------------------------------------------------------------------------------------------------------------------------------------------------------------------------------------------------------|------------------------------------------------|--------------------|-----------------------------------|
| Mengshu Wang      | A Comparison of Lung Ultrasound and Computed Tomography in the Diagnosis of Patients with COVID-19: A Systematic Review and Meta-Analysis<br><a href="https://doi.org/10.3390/diagnostics11081351">https://doi.org/10.3390/diagnostics11081351</a>                                                                                     | Diagnostic Microbiology and infectious Disease | China              | Comparison LUS and CT             |
| Millington SJ     | How I Do It: Lung Ultrasound for Patients with COVID-19 Pulmonary Disease. doi: 10.1016/j.chest.2020.08.2054                                                                                                                                                                                                                           | Chest                                          | Italy, Canada, USA | General application               |
| Møller-Sørensen H | COVID-19 Assessment with Bedside Lung Ultrasound in a Population of Intensive Care Patients Treated with Mechanical Ventilation and ECMO doi: 10.3390/diagnostics10070447                                                                                                                                                              | Diagnostics (Basel).                           | Denmark            | LUS in ICU                        |
| Mongodi S         | Lung Ultrasound in Patients with Acute Respiratory Failure Reduces Conventional Imaging and Health Care Provider Exposure to COVID-19. doi: 10.1016/j.ultrasmedbio                                                                                                                                                                     | Ultrasound Med Biol.                           | Italy              | LUS in ICU                        |
| Moro F            | How to perform lung ultrasound in pregnant women with suspected COVID-19. doi: 10.1002/uog.22028                                                                                                                                                                                                                                       | Ultrasound Obstet Gynecol.                     | Italy              | LUS in pregnancy                  |
| Mort DO           | Abnormal Lung Point-of-Care Ultrasound (POCUS) in Suspected Cases of COVID-19 pneumonia with Normal Plain Chest Radiographs - A Case Series<br><a href="https://pesquisa.bvsalud.org/controlecancer/resource/pt/mdl-33020762?src=similardocs">https://pesquisa.bvsalud.org/controlecancer/resource/pt/mdl-33020762?src=similardocs</a> | Acute Medicine                                 | UK                 | Comparison LUS and CXR            |
| Musolino AM       | Roman Lung Ultrasound Study Team for Pediatric COVID-19 (ROMULUS COVID Team). Lung Ultrasound in Children with COVID-19: Preliminary Findings. doi: 10.1016/j.ultrasmedbio.2020.04.026                                                                                                                                                 | Ultrasound Med Biol                            | Italy              | LUS in paediatrics                |
| Musolino AM       | The Role of Lung Ultrasound in Diagnosis and Follow-Up of Children with Coronavirus Disease 2019. doi: 10.1097/PCC.0000000000002436                                                                                                                                                                                                    | Pediatr Crit Care Med                          | Italy              | LUS monitoring children for COVID |
| Narinx N          | Feasibility of using point-of-care lung ultrasound for early triage of COVID-19 patients in the emergency room. doi: 10.1007/s10140-020-01849-3                                                                                                                                                                                        | Emerg Radiol.                                  | Belgium            | Triage                            |
| Norbedo S         | Lung Ultrasound Point-of-View in Pediatric and Adult COVID-19 Infection. doi: 10.1002/jum.15475                                                                                                                                                                                                                                        | J Ultrasound Med                               | Italy              | General application               |
| Nouvenne A        | Point-of-Care Chest Ultrasonography as a Diagnostic Resource for COVID-19 Outbreak in Nursing Homes. doi:                                                                                                                                                                                                                              | J Am Med Dir Assoc                             | Italy              | LUS use in nursing homes          |

|               |                                                                                                                                                                                                                                 |                                              |                |                                     |
|---------------|---------------------------------------------------------------------------------------------------------------------------------------------------------------------------------------------------------------------------------|----------------------------------------------|----------------|-------------------------------------|
|               | 10.1016/j.jamda.2020.05.050                                                                                                                                                                                                     |                                              |                |                                     |
| Nouvenne A    | Lung Ultrasound in COVID-19 Pneumonia: Correlations with Chest CT on Hospital admission. doi: 10.1159/000509223                                                                                                                 | Respiration                                  | Italy          | LUS correlation with CT             |
| Ottaviani S   | Lung ultrasonography in patients with COVID-19: comparison with CT. doi: 10.1016/j.crad.2020.07.024                                                                                                                             | Clin Radiol                                  | France         | Comparison LUS and CT               |
| Palabiyik F   | Imaging of COVID-19 pneumonia in children. DOI: 10.1259/bjr.20200647                                                                                                                                                            | Br J Radiol                                  | Turkey         | LUS in paediatrics                  |
| Pare JR       | Point-of-care Lung Ultrasound Is More Sensitive than Chest Radiograph for Evaluation of COVID-19. doi: 10.5811/westjem.2020.5.47743                                                                                             | West J Emerg Med                             | USA            | Comparison LUS and CXR              |
| Pata D        | Chest Computed Tomography and Lung Ultrasound Findings in COVID-19 Pneumonia: A Pocket Review for Non-radiologists. doi: 10.3389/fmed.2020.00375                                                                                | Front Med (Lausanne).                        | Italy          | Comparison LUS and CT               |
| Pecho-Silva S | Pulmonary Ultrasound in the Diagnosis and monitoring of Coronavirus Disease (Covid-19): A Systematic Review <a href="https://doi.org/10.1016/j.ultrasmedbio.2021.04.011">https://doi.org/10.1016/j.ultrasmedbio.2021.04.011</a> | Elsevier                                     | Peru           | General application                 |
| Peh WM        | Lung ultrasound in a Singapore COVID-19 intensive care unit patient and a review of its potential clinical utility in pandemic. doi: 10.15557/JoU.2020.0025                                                                     | J Ultrasound                                 | Singapore      | LUS in ICU                          |
| Peixotoa AO   | Applicability of lung ultrasound in COVID-19 diagnosis and evaluation of the disease progression: A systematic review doi: 10.1016/j.pulmoe.2021.02.004                                                                         | pulmonology                                  | Brazil         | General application                 |
| Pierce CW     | Clarifying the role of lung ultrasonography in COVID-19 respiratory disease. doi: 10.1503/cmaj.75311                                                                                                                            | CMAJ                                         | Canada         | General application                 |
| Pierrakos C   | Lung Ultrasound for the Guidance of Adjunctive Therapies in Two Invasively Ventilated Patients with COVID-19 doi: 10.4269/ajtmh.20-0538.                                                                                        | Am J Trop Med Hyg                            | Belgium        | LUS in guiding therapy              |
| Qian X        | Current Ultrasound Technologies and Instrumentation in the Assessment and Monitoring of COVID-19 Positive Patients. doi: 10.1109/TUFFC.2020.3020055                                                                             | IEEE Trans Ultrason Ferroelectr Freq Control | USA            | General application                 |
| Quarato CMI   | Diagnosis and monitoring of COVID-19 pneumonia in pregnant women: is lung ultrasound appropriate? doi: 10.1002/uog.22156.                                                                                                       | Ultrasound Obstet Gynecol.                   | Italy, Belgium | LUS in pregnant women with COVID-19 |

|                |                                                                                                                                                                                                                         |                               |                    |                                       |
|----------------|-------------------------------------------------------------------------------------------------------------------------------------------------------------------------------------------------------------------------|-------------------------------|--------------------|---------------------------------------|
| Quarato CMI    | Lung Ultrasound in the Diagnosis of COVID-19 Pneumonia: Not Always and Not Only What Is COVID-19 “Glitters”<br>doi: 10.3389/fmed.2021.707602                                                                            | Frontiers in Big Data journal | Italy              | General application                   |
| Recker F       | Lung Sonography in Obstetrics during COVID-19<br>doi: 10.1055/a-1228-4242                                                                                                                                               | Ann Emerg Med                 | Germany            | General application                   |
| Reisinger N    | Lung ultrasound: a valuable tool for the assessment of dialysis patients with COVID-19. doi: 10.1007/s10157-020-01903-x                                                                                                 | Clin Exp Nephrol.             | USA                | LUS in dialysis                       |
| Rojatti M      | Lung Ultrasound and Respiratory Pathophysiology in Mechanically Ventilated COVID-19 Patients-an Observational Trial <a href="https://doi.org/10.1007/s42399-020-00536-1">https://doi.org/10.1007/s42399-020-00536-1</a> | Compr Clin Med                | Italy              | LUS in monitoring ventilated patients |
| Roy S          | Deep Learning for Classification and Localization of COVID-19 Markers in Point-of-Care Lung Ultrasound. doi: 10.1109/TMI.2020.2994459                                                                                   | IEEE Trans Med Imaging        | Italy, Netherlands | LUS and Artificial Intelligence       |
| Royer O        | Lung Ultrasound Evolution in a Patient with COVID-19<br><a href="https://doi.org/10.1164/rccm.202006-2572IM">https://doi.org/10.1164/rccm.202006-2572IM</a>                                                             | Am J Respir Crit Care Med     | Canada             | General application                   |
| Rubio-Gracia J | Point-of-care lung ultrasound assessment for risk stratification and therapy guiding in COVID-19 patients. A prospective non-interventional study DOI: 10.1183/13993003.04283-2020                                      | European Respiratory Journal  | Spain              | Risk assessment                       |
| Sahu AK        | Lung sonographic findings in COVID-19 patients<br><a href="https://doi.org/10.1016/j.ajem.2020.08.080">https://doi.org/10.1016/j.ajem.2020.08.080</a>                                                                   | Am J Emerg Med                | India              | General application                   |
| Sanjeev Bhoi   | Point-of-care ultrasound in COVID-19 pandemic<br><a href="http://dx.doi.org/10.1136/postgradmedj-2020-137853">http://dx.doi.org/10.1136/postgradmedj-2020-137853</a>                                                    | Postgrad Med J                | India              | General application                   |
| Scheier E      | Could It Be Pneumonia? Lung Ultrasound in Children with Low Clinical Suspicion for Pneumonia. doi: 10.1097/pq9.0000000000000326.                                                                                        | Pediatr Qual Saf.             | Israel             | LUS in paediatrics                    |
| Scheier E      | Lung ultrasound cannot be used to screen for Covid-19 in children. doi: 10.26355/eurrev_202005_21145                                                                                                                    | Eur Rev Med Pharmacol Sci     | Israel             | LUS in paediatrics                    |
| Schmid B       | Lungensonografie bei Patienten mit Verdacht auf COVID-19 – Schritt-für-Schritt [Pulmonary Sonography in Patients with Suspected COVID-19 - Step-by-Step].                                                               | Dtsch Med Wochenschr          | Germany            | LUS application in suspected COVID    |
| Schmid M       | Lung Ultrasound findings in COVID-19 Pneumonia. doi: 10.3238/arztebl.2020.0335                                                                                                                                          | Dtsch Arztebl Int             | Germany            | General application                   |
| Schmid M       | Sonographische Bildgebung der Lunge bei COVID-19 [Lung ultrasonography in COVID-19 pneumonia].                                                                                                                          | Radiologe                     | Germany            | General application                   |

|               |                                                                                                                                                                |                             |              |                                                |
|---------------|----------------------------------------------------------------------------------------------------------------------------------------------------------------|-----------------------------|--------------|------------------------------------------------|
|               | <a href="https://doi.org/10.1007/s00117-020-00747-6">https://doi.org/10.1007/s00117-020-00747-6</a>                                                            |                             |              |                                                |
| Segura-Grau E | Flash card Lung Ultrasound and COVID-19. doi: 10.1016/j.redar.2020.05.003                                                                                      | Rev Esp Anesthesiol Reanim. | Portugal     | Guidance on LUS protocols and typical findings |
| Shaw JA       | Lung Ultrasound in COVID-19: Not Novel, but Necessary doi: 10.1159/000509763                                                                                   | Respiration                 | South Africa | General application                            |
| Shokoohi H    | Lung ultrasound monitoring in patients with COVID-19 on home isolation. doi: 10.1016/j.ajem.2020.05.079                                                        | Am J Emerg Med              | USA, Spain   | LUS patient monitoring                         |
| Shumilov E    | Comparison of Chest Ultrasound and Standard X-Ray Imaging in COVID-19 Patients. doi: 10.1055/a-1217-1603                                                       | Ultrasound Int Open         | Germany      | Comparison LUS and CXR                         |
| Skaarup KG    | Lung ultrasound findings in hospitalized COVID-19 patients in relation to venous thromboembolic events: the ECHOVID-19 study. doi: 10.1007/s40477-021-00605-8. | J Ultrasound                | Denmark      | Risk assessment                                |
| Smallwood N   | Should point-of-care ultrasound become part of healthcare worker testing for COVID? doi: 10.7861/clinmed.2020-0442                                             | Clin Med (Lond).            | UK           | LUS in testing healthcare workers for COVID    |
| Smargiassi A  | Lung Ultrasound for COVID-19 Patchy Pneumonia: Extended or Limited Evaluations? doi: 10.1002/jum.15428                                                         | J Ultrasound Med            | Italy        | Limiting LUS to specific chest regions         |
| Smargiassi A  | Lung ultrasonography for early management of patients with respiratory symptoms during COVID-19 pandemic. doi: 10.1007/s40477-020-00501-7.                     | J Ultrasound                | Italy        | General application                            |
| Smith MJ      | Point-of-care lung ultrasound in patients with COVID-19 - a narrative review. doi: 10.1111/anae.15082                                                          | Anaesthesia                 | UK           | General application                            |
| Sofia S       | Thoracic ultrasound and SARS-COVID-19: a pictorial essay. doi: 10.1007/s40477-020-00458-7                                                                      | J Ultrasound                | Italy        | General application                            |
| Soldati G     | Contrast-Enhanced Ultrasound in Patients With COVID-19: Pneumonia, Acute Respiratory Distress Syndrome, or Something Else? doi: 10.1002/jum.15338              | J Ultrasound Med.           | Italy        | Contrast-enhanced LUS                          |
| Soldati G     | Is There a Role for Lung Ultrasound During the COVID-19 Pandemic? doi: 10.1002/jum.15284                                                                       | J Ultrasound Med.           | Italy        | General application                            |
| Soldati G     | On Lung Ultrasound Patterns Specificity in the Management of COVID-19 Patients doi: 10.1002/jum.15326                                                          | J Ultrasound Med            | Italy        | General application                            |
| Soldati G     | Proposal for International Standardization of the Use of Lung                                                                                                  | J Ultrasound Med            | Italy        | Standardizing LUS                              |

|             |                                                                                                                                                                                                                                              |                           |                |                                    |
|-------------|----------------------------------------------------------------------------------------------------------------------------------------------------------------------------------------------------------------------------------------------|---------------------------|----------------|------------------------------------|
|             | Ultrasound for Patients with COVID-19: A Simple, Quantitative, Reproducible Method. <a href="https://doi.org/10.1002/jum.15285">https://doi.org/10.1002/jum.15285</a>                                                                        |                           |                | use in COVID                       |
| Speidel V   | Lung Assessment with Point-of-Care Ultrasound in Respiratory Coronavirus Disease (COVID-19): A Prospective Cohort Study. doi: 10.1016/j.ultrasmedbio.2020.12.021.                                                                            | Ultrasound Med Biol       | Switzerland    | Diagnostic accuracy of LUS         |
| Sperandeo M | Care of future mothers amid the COVID-19 outbreak: is there a monitoring role for lung ultrasound? DOI: 10.1002/uog.22146                                                                                                                    | Ultrasound Obstet Gynecol | Italy, Belgium | LUS in pregnancy                   |
| Sperandeo M | Diagnosis of coronavirus disease 2019 pneumonia in pregnant women: can we rely on lung ultrasound? doi: 10.1016/j.ajog.2020.06.028                                                                                                           | Am J Obstet Gynecol       | Italy          | LUS in pregnancy                   |
| Sperandeo M | Lung ultrasound early detection and monitoring in COVID-19 pneumonia: fact and fiction. doi: 10.1093/qjmed/hcaa165                                                                                                                           | QJM                       | China          | General application and monitoring |
| Taccari F   | COVID-19 and Lung Ultrasound: Reflections on the "Light Beam". <a href="https://doi.org/10.1002/jum.15468">https://doi.org/10.1002/jum.15468</a>                                                                                             | J Ultrasound Med          | Italy          | Physics of LUS                     |
| Tan G       | Use of Lung Ultrasound to Differentiate Coronavirus Disease 2019 (COVID-19) Pneumonia from Community-Acquired Pneumonia. <a href="https://doi.org/10.1016/j.ultrasmedbio.2020.05.006">https://doi.org/10.1016/j.ultrasmedbio.2020.05.006</a> | Ultrasound Med Biol       | China          | Modified LUS scoring system        |
| Tee A       | Contrast-enhanced ultrasound (CEUS) of the lung reveals multiple areas of microthrombi in a COVID-19 patient. doi: 10.1007/s00134-020-06085-4                                                                                                | Intensive Care Med        | UK             | Contrast-enhanced LUS              |
| Thomas A    | Lung ultrasound findings in a 64-year-old woman with COVID-19. doi: 10.1503/cmaj.200414                                                                                                                                                      | CMAJ                      | Canada         | General application                |
| Trovato GM  | Usefulness of lung ultrasound imaging in COVID-19 pneumonia: The persisting need of safety and evidences. doi: 10.1111/echo.14769                                                                                                            | Echocardiography          | Italy          | General application                |
| Tung-Chen Y | Correlation between Chest Computed Tomography and Lung Ultrasonography in Patients with Coronavirus Disease 2019 (COVID-19). DOI: 10.1016/j.ultrasmedbio.2020.07.003                                                                         | Ultrasound Med Biol       | Spain          | LUS correlation with CT            |
| Tung Chen Y | Lung Ultrasound Findings in a Covid-19 Patient with Negative Chest CT DOI: 10.1055/a-1248-9068                                                                                                                                               | Ultraschall Med           | Spain          | LUS and CT application             |
| Tung-Chen Y | Lung ultrasound in the frontline diagnosis of COVID-19 infection doi: 10.1016/j.medcli.2020.06.001                                                                                                                                           | Med Clin                  | Spain          | General application                |

|                     |                                                                                                                                                                                                 |                              |                |                                          |
|---------------------|-------------------------------------------------------------------------------------------------------------------------------------------------------------------------------------------------|------------------------------|----------------|------------------------------------------|
| Tung-Chen Y         | Lung ultrasound in the frontline diagnosis of COVID-19 infection. doi: 10.1016/j.medcli.2020.06.001                                                                                             | Med Clin (Barc).             | Spain          | General application                      |
| Tung-Chen Y         | Lung ultrasound in the monitoring of COVID-19 infection. doi: 10.7861/clinmed.2020-0123                                                                                                         | Clin Med (Lond).             | Spain          | LUS patient monitoring                   |
| Tung-Chen Y         | Time course of lung changes on thoracic ultrasound of mild COVID-19 patients. doi: 10.1016/j.eimc.2020.05.002                                                                                   | Enferm Infecc Microbiol Clin | Spain          | Patient follow-up                        |
| Vassalou EE         | Proposed Lung Ultrasound Protocol During the COVID-19 Outbreak. doi: 10.1002/jum.15402                                                                                                          | J Ultrasound Med             | Greece         | Proposed LUS protocol                    |
| Vazquez Martínez JL | Short report - Usefulness of point-of-care ultrasound in pediatric SARS-CoV-2 infection. DOI: 10.26355/eurrev_202007_22284                                                                      | Eur Rev Med Pharmacol Sci.   | Spain          | LUS in paediatrics at POC                |
| Veronese N          | Prognostic Value of Lung Ultrasonography in Older Nursing Home Residents Affected by COVID-19 doi: 10.1016/j.jamda.2020.07.034                                                                  | J Am Med Dir Assoc.          | Italy          | LUS in nursing homes for prognosticating |
| Vetrugno L          | Our Italian experience using lung ultrasound for identification, grading and serial follow-up of severity of lung involvement for management of patients with COVID-19. doi: 10.1111/echo.14664 | Echocardiography             | Italy          | LUS for grading and monitoring response  |
| Vetrugno L          | Lung Ultrasound and the COVID-19 "Pattern": Not All That Glitters Today Is Gold Tomorrow. doi: 10.1002/jum.15327                                                                                | J Ultrasound Med             | Italy          | General application                      |
| Vetrugno L          | The "pandemic" increase in lung ultrasound use in response to Covid-19: can we complement computed tomography findings? A narrative review. doi: 10.1186/s13089-020-00185-4                     | Ultrasound J                 | Italy          | LUS complementing CT findings            |
| Vieillard-Baron A   | Lung ultrasonography as an alternative to chest computed tomography in COVID-19 pneumonia? doi: 10.1007/s00134-020-06221-0                                                                      | Intensive Care Med           | France, Canada | Comparison LUS and CT                    |
| Vieira ALS          | Role of point-of-care ultrasound during the COVID-19 pandemic: our recommendations in the management of dialytic patients. doi: 10.1186/s13089-020-00177-4                                      | Ultrasound J                 | Brazil         | LUS and dialysis of COVID patients       |
| Volpicelli G        | Sonographic signs and patterns of COVID-19 pneumonia. doi: 10.1186/s13089-020-00171-w                                                                                                           | Ultrasound J.                | Italy          | General application                      |
| Volpicelli G        | What's new in lung ultrasound during the COVID-19 pandemic. doi: 10.1007/s00134-020-06048-9                                                                                                     | Intensive Care Med.          | Italy, Spain   | General application                      |

|                     |                                                                                                                                                                                                               |                                              |        |                                                   |
|---------------------|---------------------------------------------------------------------------------------------------------------------------------------------------------------------------------------------------------------|----------------------------------------------|--------|---------------------------------------------------|
| Volpicelli G        | Lung ultrasound for the early diagnosis of COVID-19 pneumonia: an international multicenter study <a href="https://doi.org/10.1007/s00134-021-06373-7">https://doi.org/10.1007/s00134-021-06373-7</a>         | Springer                                     | Italy  | General application                               |
| Wang H              | Novel 4W (When-Where-What-What) Approach of Training Point-of-Care Ultrasound (POCUS) Application in Resuscitation With High-Fidelity Simulator. doi: 10.7759/cureus.9353                                     | Cureus                                       | USA    | LUS in patient resuscitation                      |
| Wangüemert Pérez AL | Lung Ultrasound Before and After SARS-CoV-2 doi: 10.1016/j.arbres.2020.07.040.                                                                                                                                | Arch Bronconeumol.                           | Spain  | General applicatin                                |
| Wu S                | Pilot Study of Robot-assisted Tele ultrasound Based on 5G Network: a New Feasible Strategy for Early Imaging Assessment during COVID-19 Pandemic doi: 10.1109/TUFFC.2020.3020721                              | IEEE Trans Ultrason Ferroelectr Freq Control | China  | General application                               |
| Xing C              | Lung ultrasound findings in patients with COVID-19 pneumonia. doi: 10.1186/s13054-020-02876-9                                                                                                                 | Crit Care.                                   | China  | General application                               |
| Yadav A             | Lung Ultrasound in COVID-19. doi: 10.1007/s13312-020-1942-3                                                                                                                                                   | Indian Pediatr.                              | India  | General application                               |
| Yang Y              | Lung ultrasonography versus chest CT in COVID-19 pneumonia: a two-centered retrospective comparison study from China. doi: 10.1007/s00134-020-06096-1                                                         | Intensive Care Med.                          | China  | Comparison LUS and CT                             |
| Yao Z               | Lung Ultrasound Findings in Patients with Coronavirus Disease (COVID-19) <a href="https://www.ajronline.org/doi/full/10.2214/AJR.20.23513">https://www.ajronline.org/doi/full/10.2214/AJR.20.23513</a>        | AJR                                          | China  | General application                               |
| Yassa M             | Lung ultrasonography in pregnant women during the COVID-19 pandemic: an interobserver agreement study among obstetricians. doi: 10.14366/usg.20084                                                            | Ultrasonography                              | Turkey | LUS in pregnancy                                  |
| Yassa M             | Lung Ultrasound Can Influence the Clinical Treatment of Pregnant Women with COVID-19. doi: 10.1002/jum.15367                                                                                                  | J Ultrasound Med                             | Turkey | LUS in pregnancy                                  |
| Yassa M             | Outcomes of universal SARS-CoV-2 testing program in pregnant women admitted to hospital and the adjuvant role of lung ultrasound in screening: a prospective cohort study. doi: 10.1080/14767058.2020.1798398 | J Matern Fetal Neonatal Med                  | Turkey | LUS in pregnancy in screening for COVID pneumonia |
| Yasukawa K          | Point-of-Care Lung Ultrasound Findings in Patients with COVID-19 Pneumonia. doi: 10.4269/ajtmh.20-0280                                                                                                        | Am J Trop Med Hyg.                           | UK     | General application                               |
| Ye R                | Feasibility of a 5G-Based Robot-Assisted Remote Ultrasound                                                                                                                                                    | Chest.                                       | China  | Robotic LUS                                       |



|                 |                                                                                                                                                                        |                            |        |                                             |
|-----------------|------------------------------------------------------------------------------------------------------------------------------------------------------------------------|----------------------------|--------|---------------------------------------------|
|                 | System for Cardiopulmonary Assessment of Patients with COVID-19. doi: 10.1016/j.chest.2020.06.068                                                                      |                            |        |                                             |
| Youssef A       | Lung Ultrasound Is Not a Useful Screening Tool for Severe Acute Respiratory Syndrome Coronavirus 2 in Pregnant Women: A Pilot Study. doi: 10.1002/jum.15451            | J Ultrasound Med           | Italy  | LUS in pregnancy                            |
| Youssef A       | Lung ultrasound in the coronavirus disease 2019 pandemic: a practical guide for obstetricians and gynecologists. doi: 10.1016/j.ajog.2020.05.014.                      | Am J Obstet Gynecol        | Italy  | General application                         |
| Yu RZ           | Role of 5G-powered remote robotic ultrasound during the COVID-19 outbreak: insights from two cases. DOI: 10.26355/eurrev_202007_22283                                  | Eur Rev Med Pharmacol Sci  | China  | Robotic LUS                                 |
| Yusuf GT        | The use of contrast-enhanced ultrasound in COVID-19 lung imaging. doi: 10.1007/s40477-020-00517-z                                                                      | J Ultrasound               | UK     | Contrast-enhanced US                        |
| Zanforlin A     | How Is COVID-19 Changing Lung Ultrasound? A Survey by the Thoracic Ultrasound Academy. doi: 10.1002/jum.15398                                                          | J Ultrasound Med           | Italy  | General application                         |
| Zanforlin A     | Lung Ultrasound During the COVID-19 Pandemic: Building a Mobile Lung Ultrasound Unit. doi: 10.1002/jum.15375                                                           | J Ultrasound Med           | Italy  | Mobile Ultrasound                           |
| Zhang LN        | [Recommendations for the treatment of severe coronavirus disease 2019 based on critical care ultrasound] DOI: 10.3760/cma.j.cn112138-20200219-00098                    | Zhonghua nei ke za zhi.    | China  | LUS in ICU                                  |
| Zhang Y         | Lung Ultrasound Findings in Patients with Coronavirus Disease (COVID-19). doi: 10.2214/AJR.20.23513                                                                    | AJR Am J Roentgenol        | China  | General application                         |
| Zhang Z         | The Role of Lung Ultrasound in the Assessment of Novel Coronavirus Pneumonia. doi: 10.1053/j.jvca.2020.04.040                                                          | J Cardiothorac Vasc Anesth | China  | General application                         |
| Zhao L          | Lung Ultrasound Score in Evaluating the Severity of Coronavirus Disease 2019 (COVID-19) Pneumonia. doi: 10.1016/j.ultrasmedbio.2020.07.024                             | Ultrasound Med Biol        | China  | LUS score to evaluate severity of pneumonia |
| Zieleskiewicz L | Comparative study of lung ultrasound and chest computed tomography scan in the assessment of severity of confirmed COVID-19 pneumonia. doi: 10.1007/s00134-020-06186-0 | Intensive Care Med         | France | Comparison LUS and CT                       |
| Zieleskiewicz L | Ultrasound findings in patients with COVID-19 pneumonia in early and late stages: Two case-reports. doi: 10.1016/j.accpm.2020.04.015                                   | Anaesth Crit Care Pain Med | France | General application                         |
